# Supplementary material for: The zebrafish as a model system for analyzing mammalian and native α-crystallin promoter function
Source: PubMed Central journal article supplement (PMC5708185; doi:10.7717/peerj.4093), 2017-11-27

### Spectral library

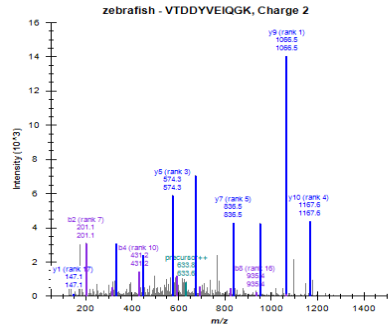

### 1 dpf

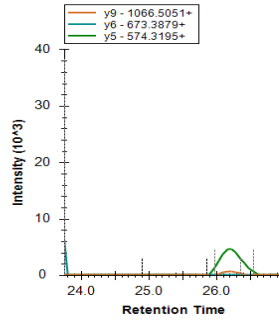

### 2 dpf

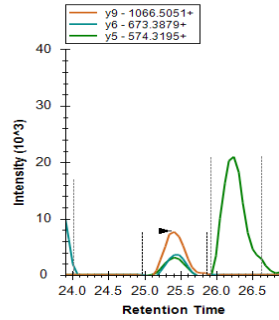

### 3 dpf

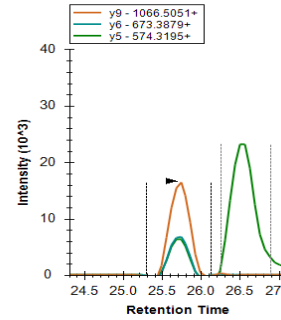

### 4 dpf

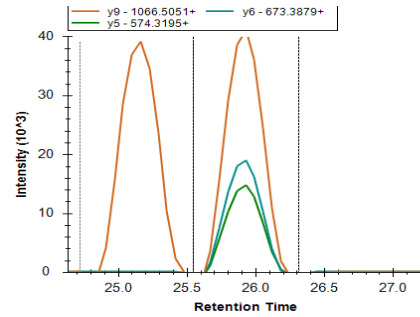

### 5 dpf

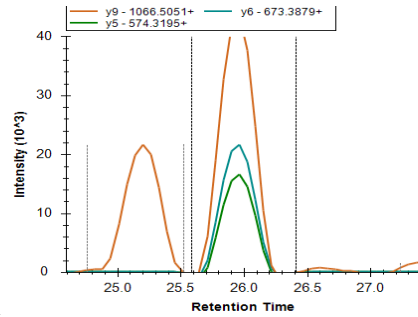

### 6 dpf

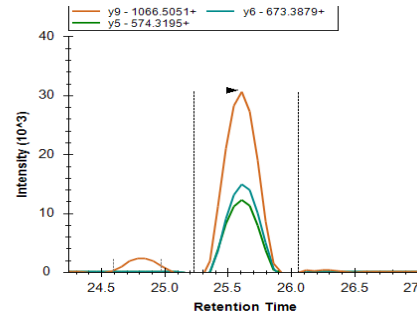

### Peak integration results

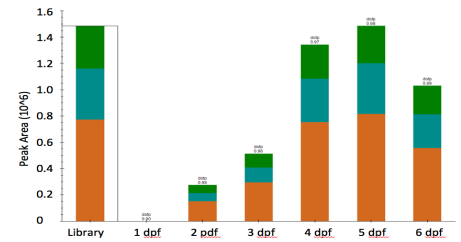

Supplement: peerj-05-4093-s006.pdf [file peerj-05-4093-s006.pdf]
