# Supplementary material for: The zebrafish as a model system for analyzing mammalian and native α-crystallin promoter function
Source: PubMed Central journal article supplement (PMC5708185; doi:10.7717/peerj.4093), 2017-11-27

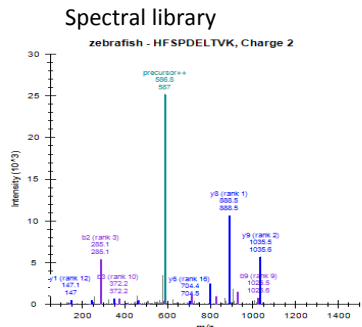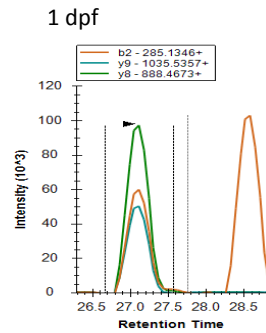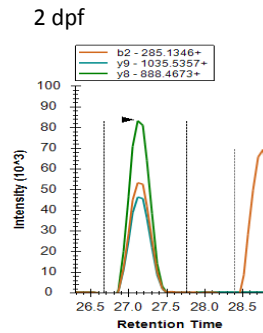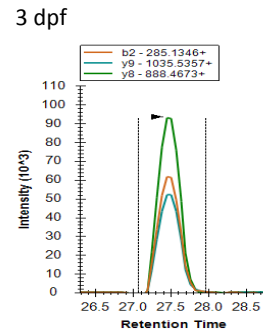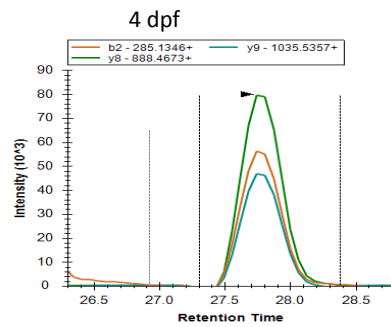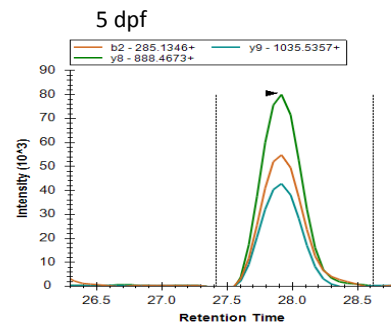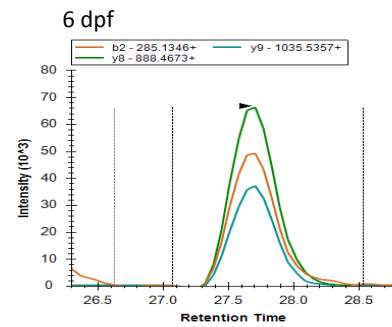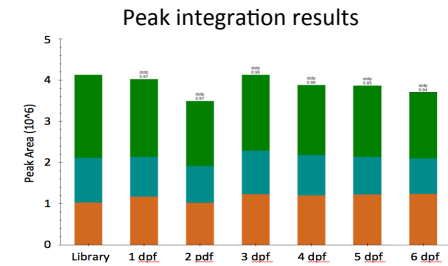

Supplement: peerj-05-4093-s007.pdf [file peerj-05-4093-s007.pdf]
