# Supplementary material for: The zebrafish as a model system for analyzing mammalian and native α-crystallin promoter function
Source: PubMed Central journal article supplement (PMC5708185; doi:10.7717/peerj.4093), 2017-11-27

### 4 dpf eyes

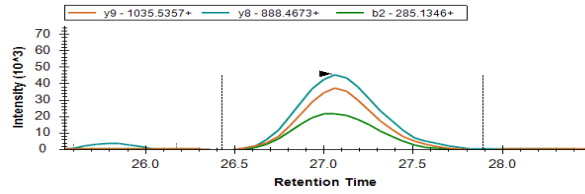

### 4 dpf trunks

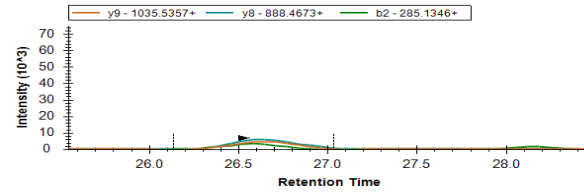

### 7 dpf eyes

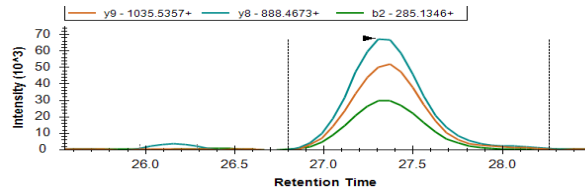

### 7 dpf trunks

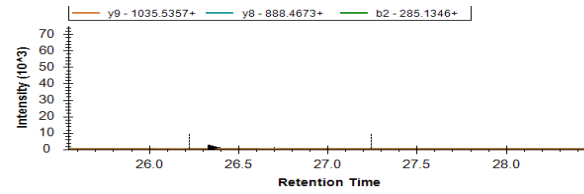

### Spectral library

zebrafish\_eye\_body\_compare - HFSPDELTVK, Charge 2

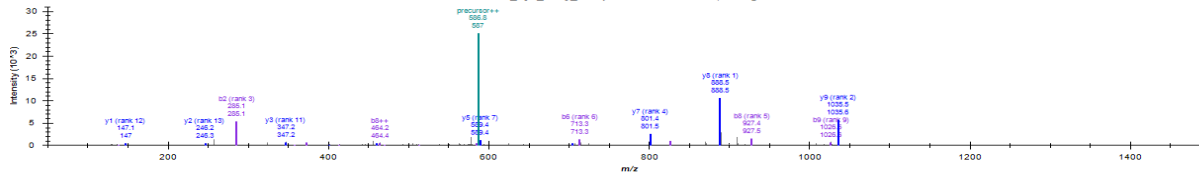

### Peak integration results

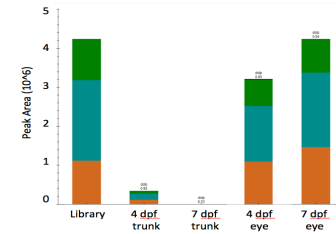

Supplement: peerj-05-4093-s011.pdf [file peerj-05-4093-s011.pdf]
