# Supplementary material for: The zebrafish as a model system for analyzing mammalian and native α -crystallin promoter function
Source: PeerJ journal article supplement (doi:10.7717/peerj.4093), 2017-11-27

### Spectral library

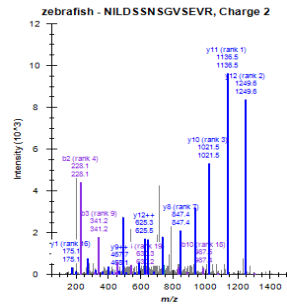

### 1 dpf

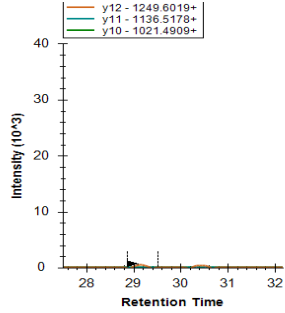

### 2 dpf

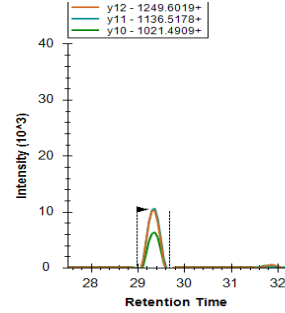

### 3 dpf

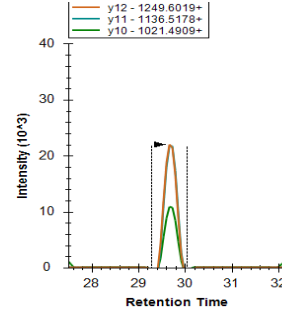

### 4 dpf

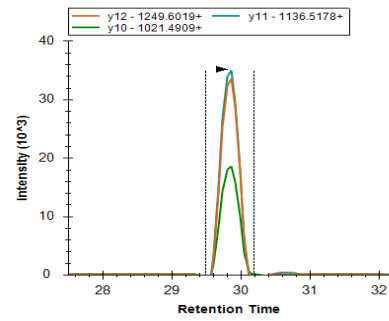

### 5 dpf

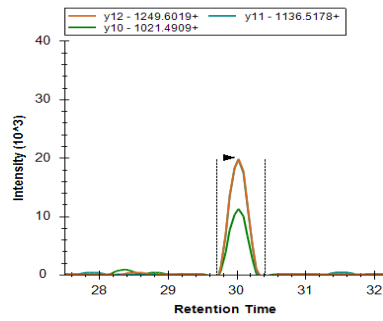

### 6 dpf

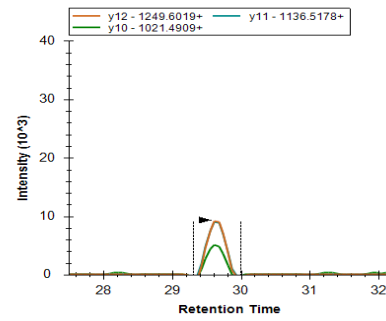

### Peak integration results

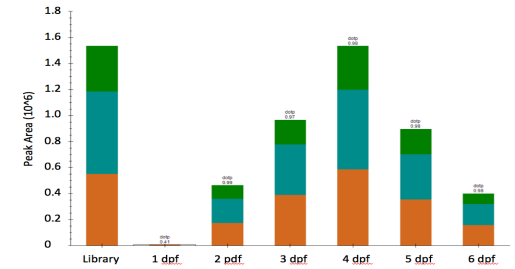

Supplement: Supplemental_Fig_2.pdf [file Supplemental_Fig_2.pdf]
