# Supplementary material for: The zebrafish as a model system for analyzing mammalian and native α -crystallin promoter function
Source: PeerJ journal article supplement (doi:10.7717/peerj.4093), 2017-11-27

4 dpf eyes

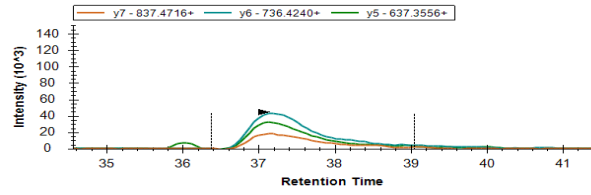

4 dpf trunks

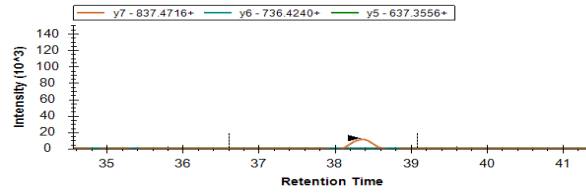

7 dpf eyes

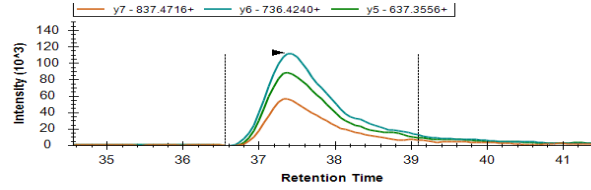

7 dpf trunks

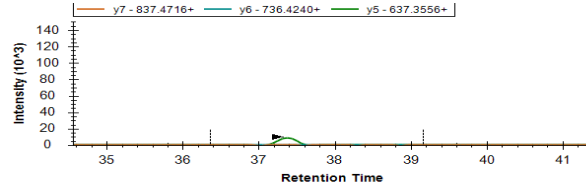

Peak integration results

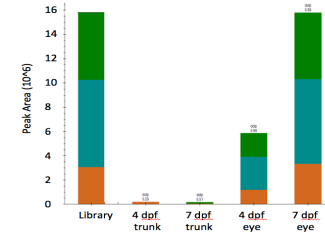

Spectral library

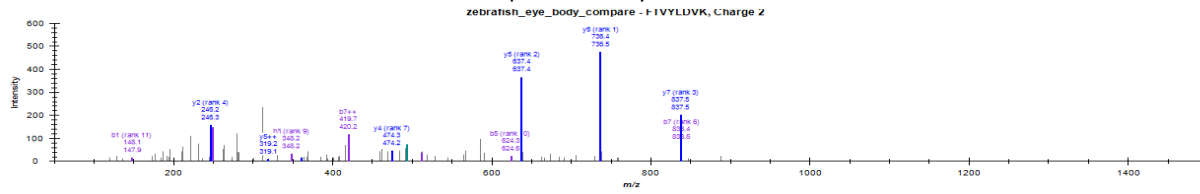

Supplement: Supplemental_Fig_6.pdf [file Supplemental_Fig_6.pdf]
